# Supplementary material for: The percentage of bacterial genes on leading versus lagging strands is influenced by multiple balancing forces
Source: PubMed Central journal article supplement — Nucleic Acids Res. 2012 Jun 25;40(17):8210–8. doi: 10.1093/nar/gks605 (PMC3458553; doi:10.1093/nar/gks605), 2012-06-25
Supplement: supp_gks605_nar-00337-h-2012-File006.pdf [file supp_gks605_nar-00337-h-2012-File006.pdf]

## Supplementary figures

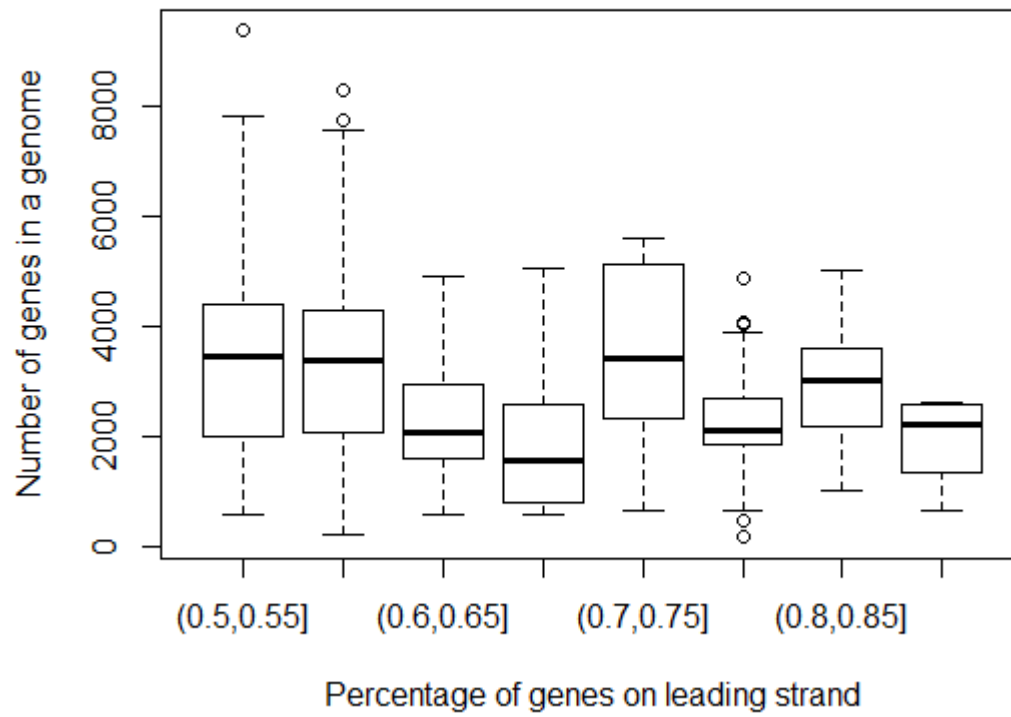

Supplementary Figure S1: Boxplot of the number of genes in a genome versus the percentage of genes to be on leading strand

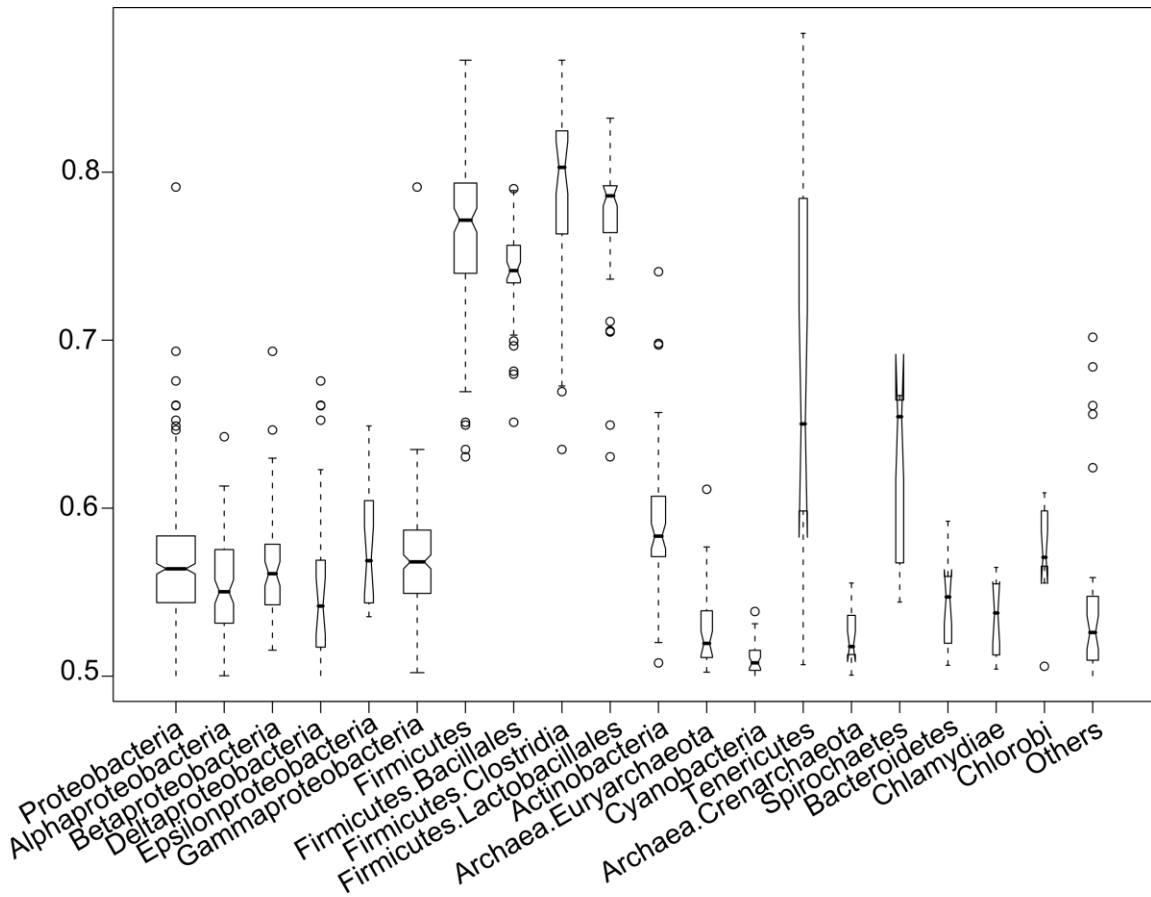

Supplementary Figure S2: Distribution of percentages of genes on the leading strand across different taxonomical groups

Essential genes for 13 bacteria, preference: 0.0128

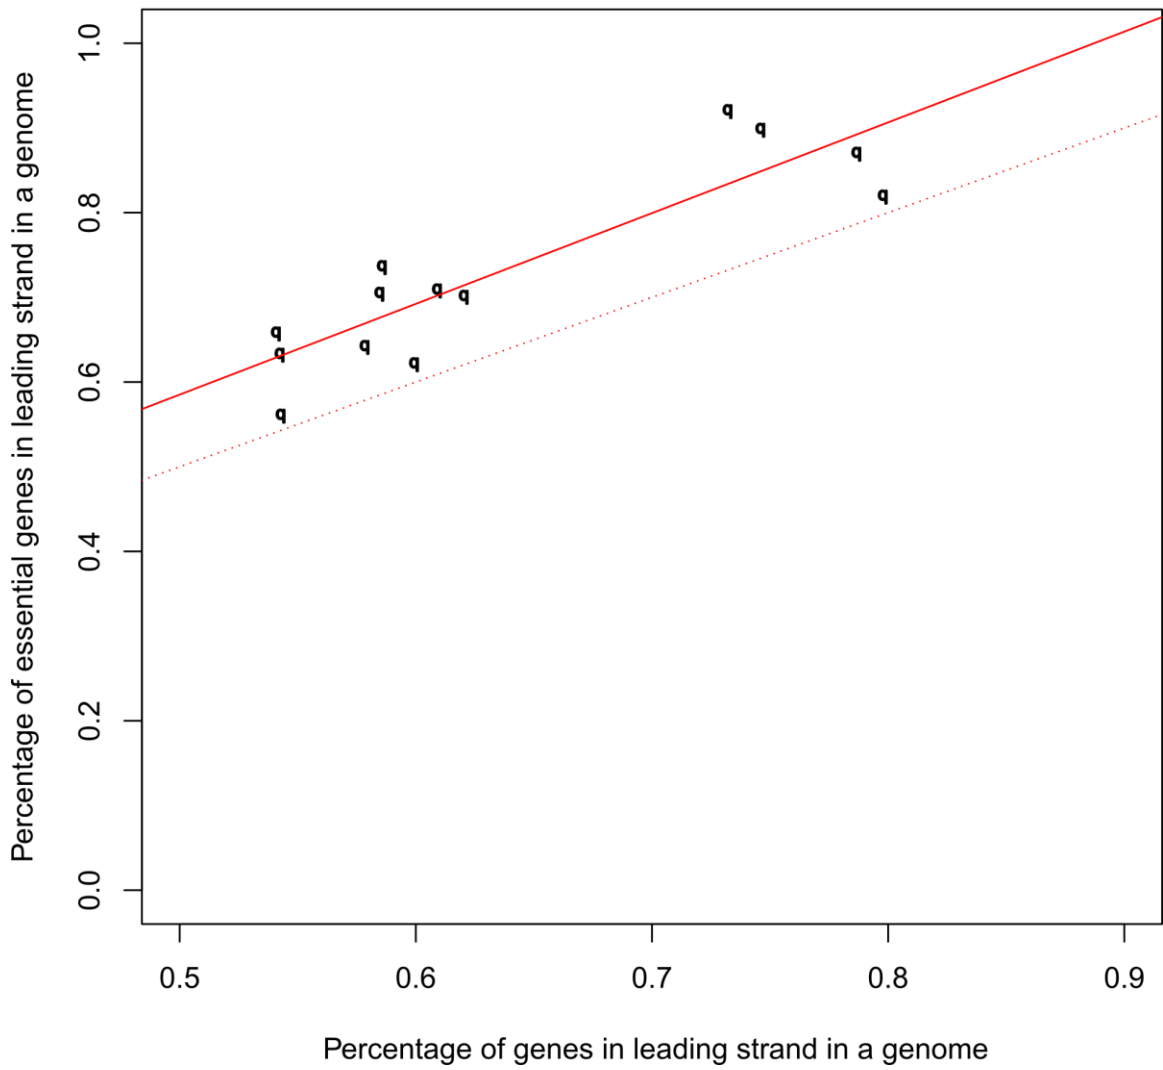

Supplementary Figure S3: Preferences of essential genes in leading strand across 13 genomes
